# Supplementary figures and images for: Effect of Silica Based Nanoparticles against Plasmodium falciparum and Leishmania infantum parasites
Source: MDPI journal article supplement (doi:10.3390/jox11040011), 2021-11-16

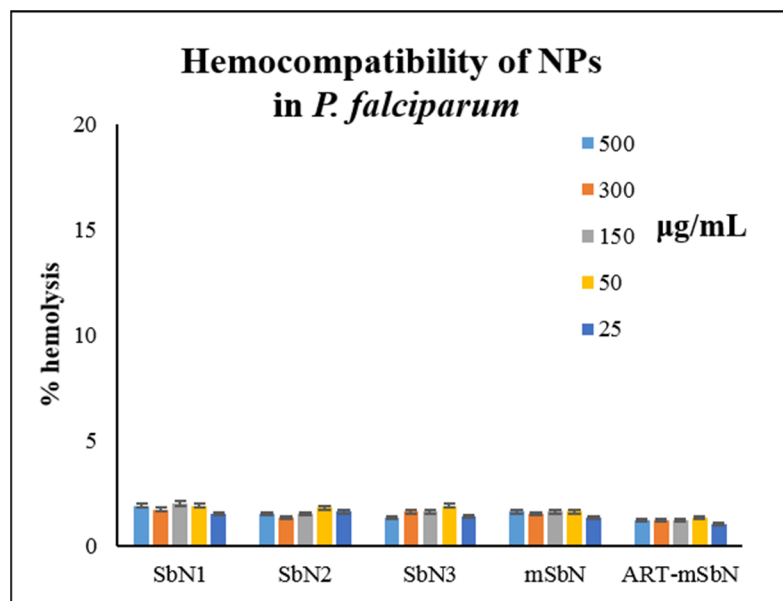

**Figure S1.** Hemolytic effect of NPs in parasitized erythrocytes.

Supplement: s1 [file s1]
